# Supplementary material
Source: MDPI journal article supplement (https://www.mdpi.com/2073-4441/15/20/3555)
Supplement: s1 [file s1]

**Supplementary Table S1.** Optimization results for Chungju Reservoir during drought year based on initial water level of 126.2 EL.m.

| 2015-MM | Water level | Inflow | Water allocation | Spillway discharge | Total discharge | Effective reservoir storage ratio |
|---------|-------------|--------|------------------|--------------------|-----------------|-----------------------------------|
|         | EL.m        | CMS    | CMS              | CMS                | CMS             | %                                 |
| 01      | 121.7       | 14.1   | 104.3            | -                  | 104.3           | 26.0                              |
| 02      | 119.3       | 21.8   | 67.6             | -                  | 67.6            | 19.9                              |
| 03      | 117.6       | 45.1   | 72.6             | -                  | 72.6            | 15.8                              |
| 04      | 119.1       | 105.9  | 82.1             | -                  | 82.1            | 19.2                              |
| 05      | 117.1       | 35.1   | 66.9             | -                  | 66.9            | 14.5                              |
| 06      | 114.5       | 25.7   | 65.1             | -                  | 65.1            | 8.8                               |
| 07      | 119.7       | 113.8  | 33.7             | -                  | 33.7            | 20.7                              |
| 08      | 122.8       | 102.3  | 44.4             | -                  | 44.4            | 29.4                              |
| 09      | 121.8       | 38.8   | 59.8             | -                  | 59.8            | 26.3                              |
| 10      | 119.6       | 20.6   | 58.6             | -                  | 58.6            | 20.7                              |
| 11      | 120.4       | 82.0   | 67.8             | -                  | 67.8            | 22.7                              |
| 12      | 120.0       | 59.4   | 66.7             | -                  | 66.7            | 21.6                              |
| Average | 119.5       | 55.4   | 65.8             | -                  | 65.8            | 20.5                              |

**Supplementary Table S2.** Optimization results for Soyanggang Reservoir during drought year based on initial water level of 165.2 EL.m.

| 2015-MM | Water level | Inflow | Water allocation | Spillway discharge | Total discharge | Effective reservoir storage ratio |
|---------|-------------|--------|------------------|--------------------|-----------------|-----------------------------------|
|         | EL.m        | CMS    | CMS              | CMS                | CMS             | %                                 |
| 01      | 165.4       | 3.11   | 8.10             | -                  | 8.10            | 24.7                              |
| 02      | 162.8       | 4.61   | 40.3             | -                  | 40.3            | 19.9                              |
| 03      | 160.4       | 9.2    | 36.6             | -                  | 36.6            | 15.8                              |
| 04      | 162.4       | 53.4   | 29.7             | -                  | 29.7            | 19.2                              |
| 05      | 159.7       | 11.9   | 43.5             | -                  | 43.5            | 14.5                              |
| 06      | 156.3       | 7.47   | 44.1             | -                  | 44.1            | 9.14                              |
| 07      | 163.7       | 95.3   | 12.6             | -                  | 12.6            | 21.6                              |
| 08      | 168.3       | 96.9   | 37.0             | -                  | 37.0            | 30.5                              |
| 09      | 166.7       | 24.8   | 46.5             | -                  | 46.5            | 27.4                              |
| 10      | 163.2       | 8.2    | 53.0             | -                  | 53.0            | 20.7                              |
| 11      | 164.3       | 58.2   | 44.1             | -                  | 44.1            | 22.7                              |
| 12      | 163.7       | 30.3   | 37.6             | -                  | 37.6            | 21.6                              |
| Average | 163.1       | 33.6   | 36.1             | -                  | 36.1            | 20.6                              |

**Supplementary Table S3.** Optimization results for Hwacheon Reservoir during drought year based on initial water level of 165.8 EL.m.

| 2015-MM | Water level | Inflow | Water allocation | Spillway discharge | Total discharge | Effective reservoir storage ratio |
|---------|-------------|--------|------------------|--------------------|-----------------|-----------------------------------|
|         | EL.m        | CMS    | CMS              | CMS                | CMS             | %                                 |
| 01      | 164.37      | 4.86   | 11.56            | -                  | 11.56           | 24.81                             |
| 02      | 163         | 4.69   | 16.13            | -                  | 16.13           | 19.98                             |
| 03      | 161.79      | 6.06   | 14.83            | -                  | 14.83           | 15.89                             |
| 04      | 162.8       | 19.81  | 12.21            | -                  | 12.21           | 19.32                             |
| 05      | 161.4       | 5.8    | 15.93            | -                  | 15.93           | 14.59                             |
| 06      | 159.11      | 3.11   | 19.49            | -                  | 19.49           | 7.19                              |
| 07      | 162.05      | 98.22  | 77.75            | -                  | 77.75           | 16.74                             |
| 08      | 164.05      | 57.48  | 42.66            | -                  | 42.66           | 23.66                             |
| 09      | 163.36      | 12.41  | 17.76            | -                  | 17.76           | 21.24                             |
| 10      | 163.23      | 11.51  | 12.48            | -                  | 12.48           | 20.79                             |
| 11      | 163.81      | 16.62  | 12.11            | -                  | 12.11           | 22.83                             |
| 12      | 163.5       | 17.32  | 19.66            | -                  | 19.66           | 21.74                             |
| Average | 162.71      | 21.49  | 22.71            | -                  | 22.71           | 19.07                             |

**Supplementary Table S4.** Optimization results for Chungju Reservoir during drought year based on initial water level of 128.5 EL.m.

| 2018-MM | Water level | Inflow | Water allocation | Spillway discharge | Total discharge | Effective reservoir storage ratio |
|---------|-------------|--------|------------------|--------------------|-----------------|-----------------------------------|
|         | EL.m        | CMS    | CMS              | CMS                | CMS             | %                                 |
| 01      | 124.4       | 7.9    | 97.2             | -                  | 97.2            | 33.9                              |
| 02      | 120.0       | 6.7    | 97.2             | -                  | 97.2            | 21.7                              |
| 03      | 119.1       | 80.5   | 97.2             | -                  | 97.2            | 19.2                              |
| 04      | 123.0       | 179.4  | 106.3            | -                  | 106.3           | 29.8                              |
| 05      | 129.0       | 248.2  | 119.0            | -                  | 119.0           | 49.0                              |
| 06      | 125.5       | 43.7   | 125.2            | -                  | 125.2           | 37.3                              |
| 07      | 135.1       | 354.0  | 115.2            | -                  | 115.2           | 72.8                              |
| 08      | 138.0       | 279.8  | 192.5            | -                  | 192.5           | 85.8                              |
| 09      | 138.0       | 397.5  | 397.5            | -                  | 397.5           | 85.8                              |
| 10      | 139.7       | 157.5  | 105.2            | -                  | 105.2           | 93.6                              |
| 11      | 139.8       | 101.4  | 97.2             | -                  | 97.2            | 94.2                              |
| 12      | 138.6       | 59.6   | 97.2             | -                  | 97.2            | 88.6                              |
| Average | 130.8       | 159.7  | 137.3            | -                  | 137.3           | 59.3                              |

**Supplementary Table S5.** Optimization results for Soyanggang Reservoir during drought year based on initial water level of 181.0 EL.m.

| 2018-MM | Water level | Inflow | Water allocation | Spillway discharge | Total discharge | Effective reservoir storage ratio |
|---------|-------------|--------|------------------|--------------------|-----------------|-----------------------------------|
|         | EL.m        | CMS    | CMS              | CMS                | CMS             | %                                 |
| 01      | 176.6       | 1.7    | 78.3             | -                  | 78.3            | 49.6                              |
| 02      | 174.2       | 2.0    | 46.2             | -                  | 46.2            | 43.6                              |
| 03      | 173.0       | 28.5   | 46.2             | -                  | 46.2            | 41.0                              |
| 04      | 175.5       | 86.8   | 46.2             | -                  | 46.2            | 46.9                              |
| 05      | 181.8       | 156.5  | 46.2             | -                  | 46.2            | 63.4                              |
| 06      | 180.3       | 16.9   | 46.2             | -                  | 46.2            | 59.2                              |
| 07      | 186.0       | 156.7  | 46.2             | -                  | 46.2            | 75.8                              |
| 08      | 190.3       | 168.3  | 78.2             | -                  | 78.2            | 89.3                              |
| 09      | 190.3       | 63.7   | 63.7             | -                  | 63.7            | 89.3                              |
| 10      | 190.6       | 51.7   | 46.2             | -                  | 46.2            | 90.1                              |
| 11      | 190.6       | 46.9   | 46.2             | -                  | 46.2            | 90.2                              |
| 12      | 189.1       | 13.7   | 46.2             | -                  | 46.2            | 85.3                              |
| Average | 183.2       | 66.1   | 53.0             | -                  | 53.0            | 68.6                              |

**Supplementary Table S6.** Optimization results for Hwacheon Reservoir during drought year based on initial water level of 169.4 EL.m.

| 2018-MM | Water level | Inflow | Water allocation | Spillway discharge | Total discharge | Effective reservoir storage ratio |
|---------|-------------|--------|------------------|--------------------|-----------------|-----------------------------------|
|         | EL.m        | CMS    | CMS              | CMS                | CMS             | %                                 |
| 01      | 167.8       | 8.6    | 22.2             | -                  | 22.2            | 37.7                              |
| 02      | 166.3       | 8.5    | 22.2             | -                  | 22.2            | 32.0                              |
| 03      | 165.0       | 11.8   | 22.2             | -                  | 22.2            | 27.1                              |
| 04      | 166.4       | 33.5   | 22.2             | -                  | 22.2            | 32.2                              |
| 05      | 173.8       | 88.4   | 22.2             | -                  | 22.2            | 63.1                              |
| 06      | 165.8       | 20.8   | 94.1             | -                  | 94.1            | 30.0                              |
| 07      | 175.0       | 131.3  | 47.9             | -                  | 47.9            | 68.9                              |
| 08      | 175.0       | 67.7   | 67.7             | -                  | 67.7            | 68.9                              |
| 09      | 175.0       | 29.9   | 29.9             | -                  | 29.9            | 68.9                              |
| 10      | 174.5       | 17.0   | 22.2             | -                  | 22.2            | 66.5                              |
| 11      | 175.0       | 27.6   | 22.2             | -                  | 22.2            | 68.9                              |
| 12      | 174.1       | 12.8   | 22.2             | -                  | 22.2            | 64.5                              |
| Average | 171.1       | 38.2   | 34.8             | -                  | 34.8            | 52.4                              |

**Supplementary Table S7.** Optimization results for Chungju Reservoir during drought year based on initial water level of 134.4 EL.m.

| 2020-MM | Water level | Inflow | Water allocation | Spillway discharge | Total discharge | Effective reservoir storage ratio |
|---------|-------------|--------|------------------|--------------------|-----------------|-----------------------------------|
|         | EL.m        | CMS    | CMS              | CMS                | CMS             | %                                 |
| 01      | 133.9       | 84.4   | 97.2             | -                  | 97.2            | 68.0                              |
| 02      | 132.7       | 61.9   | 97.2             | -                  | 97.2            | 63.1                              |
| 03      | 132.2       | 83.6   | 97.2             | -                  | 97.2            | 61.1                              |
| 04      | 130.1       | 49.9   | 106.3            | -                  | 106.3           | 52.9                              |
| 05      | 129.1       | 96.4   | 119.0            | -                  | 119.0           | 49.6                              |
| 06      | 125.0       | 28.8   | 125.2            | -                  | 125.2           | 35.7                              |
| 07      | 133.9       | 333.2  | 115.2            | -                  | 115.2           | 68.1                              |
| 08      | 138.0       | 1024.5 | 778.0            | 127.8              | 905.8           | 85.8                              |
| 09      | 138.0       | 458.8  | 458.8            | -                  | 458.8           | 85.8                              |
| 10      | 136.0       | 45.8   | 105.2            | -                  | 105.2           | 77.0                              |
| 11      | 133.7       | 27.7   | 97.2             | -                  | 97.2            | 67.0                              |
| 12      | 130.6       | 16.1   | 97.2             | -                  | 97.2            | 54.9                              |
| Average | 132.8       | 192.6  | 191.1            | 10.7               | 201.8           | 64.1                              |

**Supplementary Table S8.** Optimization results for Soyanggang Reservoir during drought year based on initial water level of 176.6 EL.m.

| 2020-MM | Water level | Inflow | Water allocation | Spillway discharge | Total discharge | Effective reservoir storage ratio |
|---------|-------------|--------|------------------|--------------------|-----------------|-----------------------------------|
|         | EL.m        | CMS    | CMS              | CMS                | CMS             | %                                 |
| 01      | 176.7       | 47.0   | 46.2             | -                  | 46.2            | 49.7                              |
| 02      | 175.2       | 20.7   | 46.2             | -                  | 46.2            | 46.2                              |
| 03      | 174.7       | 37.9   | 46.2             | -                  | 46.2            | 44.9                              |
| 04      | 173.9       | 32.5   | 46.2             | -                  | 46.2            | 42.9                              |
| 05      | 175.7       | 75.1   | 46.2             | -                  | 46.2            | 47.3                              |
| 06      | 174.5       | 26.7   | 46.2             | -                  | 46.2            | 44.4                              |
| 07      | 180.9       | 156.8  | 46.2             | -                  | 46.2            | 61.0                              |
| 08      | 190.3       | 545.5  | 250.0            | 107.3              | 357.3           | 89.3                              |
| 09      | 190.3       | 296.6  | 250.0            | 46.6               | 296.6           | 89.3                              |
| 10      | 189.0       | 17.7   | 46.2             | -                  | 46.2            | 85.0                              |
| 11      | 187.5       | 15.1   | 46.2             | -                  | 46.2            | 80.5                              |
| 12      | 185.6       | 5.4    | 46.2             | -                  | 46.2            | 74.4                              |
| Average | 181.2       | 106.4  | 80.2             | 12.8               | 93.0            | 62.9                              |

**Supplementary Table S9.** Optimization results for Hwacheon Reservoir during drought year based on initial water level of 171.6 EL.m.

| 2020-MM | Water level | Inflow | Water allocation | Spillway discharge | Total discharge | Effective reservoir storage ratio |
|---------|-------------|--------|------------------|--------------------|-----------------|-----------------------------------|
|         | EL.m        | CMS    | CMS              | CMS                | CMS             | %                                 |
| 01      | 171.6       | 22.3   | 22.2             | -                  | 22.2            | 53.3                              |
| 02      | 170.9       | 15.2   | 22.2             | -                  | 22.2            | 50.3                              |
| 03      | 170.4       | 17.5   | 22.2             | -                  | 22.2            | 48.1                              |
| 04      | 169.4       | 13.3   | 22.2             | -                  | 22.2            | 44.1                              |
| 05      | 171.2       | 38.1   | 22.2             | -                  | 22.2            | 51.5                              |
| 06      | 170.6       | 16.7   | 22.2             | -                  | 22.2            | 49.0                              |
| 07      | 171.6       | 31.3   | 22.2             | -                  | 22.2            | 53.3                              |
| 08      | 175.0       | 723.2  | 185.0            | 504.7              | 689.7           | 68.9                              |
| 09      | 175.0       | 311.2  | 185.0            | 126.2              | 311.2           | 68.9                              |
| 10      | 174.3       | 14.8   | 22.2             | -                  | 22.2            | 65.4                              |
| 11      | 173.5       | 14.1   | 22.2             | -                  | 22.2            | 61.8                              |
| 12      | 172.2       | 9.8    | 22.2             | -                  | 22.2            | 56.0                              |
| Average | 172.1       | 102.3  | 49.3             | 52.6               | 101.9           | 55.9                              |
